# Supplementary material for: Closed-loop phase-locked auditory stimulation system at home enhance slow wave sleep for patients with chronic insomnia: A randomized, placebo-controlled trial
Source: Research Square preprint supplement (doi:10.21203/rs.3.rs-6885148/v1), 2025-09-08
Supplement: Supplementary file 1 [file c1d66b3e013cdb97836129dd.docx]

**Materails one**

MNE package and custom Python scripts were utilized for pre-processing and analysis of the EEG data. To evaluate the performance of SO-detection algorithm, we summarized the instantaneous phase of SO when each tone was delivered. Firstly, SO phase was calculated as following processes: EEG signals recorded from the Fp1 region were subjected to band-pass filtering from 0.7 to 1 Hz using a zero-phase shift, Hamming-windowed sinc finite-impulse response (FIR) filter, followed by a Hilbert transform for phase extraction. Secondly, the number frequency of real phase when tone delivering was calculated and plotted as circular histograms for STIM and SHAM conditions, respectively.

Tone-evoked EEG potential was also calculated. Firstly, the EEG signal were band-pass filtered between 0.5 and 35 Hz and averaged across all blocks under STIM and SHAM conditions, respectively. Secondly, EEG data were segmented into 3.5-second clips. Each clip including 0.5-second EEG before stimulation and 3 seconds post-stimulation (STIM or SHAM). Thirdly, each clip was baseline-corrected relative to its 0.5-second pre-stimulus interval. Lastly, the clips were averaged under STIM and SHAM conditions respectively.

Power spectral density (PSD) was computed for each epoch with a frequency resolution of 0.25 Hz (2000-point FFT). The PSD estimates were then averaged across all epochs and smoothed using a three-point moving average under STIM and SHAM condition respectively. To remove the EEG variations across nights and subjects, for each epoch, the power of each 0.25-Hz frequency band was normalized to the cumulative power (MCP) of the 0.25-30 Hz band. Finally, the average percent power change from SHAM blocks to STIM blocks was calculated[1]. The percentage power differences between STIM and SHAM blocks were calculated in following six frequency bands: SWA (0.5-4Hz), theta (4-8Hz), alpha (8-12Hz), slow spindle (12-14Hz), fast spindle (14-16Hz), and beta (16-20Hz). The calculation was performed using the formula:(STIM power - SHAM power)*100 /SHAM power.

Event-related spectral perturbation (ERSP) plots were used to detect time-varying changes or perturbations in the spectral content that might not been captured in time-averaged signals[16, 17] . The ERSP of each epoch was calculated with and the "mne.time_frequency.tfr_morlet" function from MNE Python package. Briefly, it uses a family of complex Morlet wavelets to decompose signals into time-frequency representations. We used 100 log-spaced frequencies corresponding to each 0.25-Hz frequency bin and increased the number of wavelet cycles used from 1 cycle at 0.8 Hz to 40 cycles at 20 Hz. To estimate phase consistency across trials at different frequencies and characterize the amount of phase-locking across trials, we used inter-trial coherence(ITC). A significant increase in ITC would indicate that EEG activity at a specified time and frequency was phase-locked with respect to stimulus onset.

Reference:

[1] Ong JL,  Lo JC,  Chee NI,  Santostasi G,  Paller KA,  Zee PC, et al. Effects of phase-locked acoustic stimulation during a nap on EEG spectra and declarative memory consolidation. Sleep Med 2016;20:88-97.

[2] Makeig S. Auditory event-related dynamics of the EEG spectrum and effects of exposure to tones. Electroencephalogr Clin Neurophysiol 1993;86(4):283-93.

[3] Tallon-Baudry C,  Bertrand O. Oscillatory gamma activity in humans and its role in object representation. Trends Cogn Sci Oscillatory gamma activity in humans and its role in object representation. Trends Cogn Sci 1999;3(4):151-162.
